# Supplementary material
Source: HighWire-hosted journal article supplement (https://ijgc.bmj.com/highwire/filestream/13431/field_highwire_adjunct_files/0/ijgc-2019-000928supp001_data_supplement.pdf)
Supplement: ijgc-2019-000928supp001_data_supplement.pdf [file ijgc-2019-000928supp001_data_supplement.pdf]

INTERNATIONAL JOURNAL OF  
**GYNECOLOGICAL CANCER**

**Does small volume metastatic lymph node disease affect long-term prognosis in early cervical cancer?**

**Co-authors:** Andra Nica, Lillian Gien, Sarah Ferguson, Allan Covens

**Survival in patients with micrometastasis and ITC is comparable to node negative patients. A full lymphadenectomy may be omitted. Adjuvant treatment decisions should be made taking into account all relevant patient and tumor factors.**

Recurrence free survival in patients with early cervical cancer and small volume nodal metastases is comparable to that in node negative patients.

Pelvic and para-aortic lymphadenectomy may not be necessary due to the low incidence of positive non-sentinel nodes.

Most patients who receive adjuvant treatment have intermediate or high risk features that primarily drive that decision.

Read the full article by searching the DOI: **10.1136/ijgc-2019-000928**
